# Supplementary material for: Metal–organic framework-based micropipette is a metal ion responsive nanochannel after adsorbing H2S
Source: Royal Society of Chemistry journal article supplement (doi:10.1039/d1cc02411f), 2021-01-01
Supplement: d1cc02411f1.pdf [file d1cc02411f1.pdf]

## Electronic Supplementary Information (ESI)

### **Metal ions responsive nanochannel by H<sub>2</sub>S absorbed in Metal-Organic Framework-based micropipette**

Shiyi Tan,<sup>ab</sup> Chenglong Liang,<sup>b</sup> Yue Zhu,<sup>b</sup> Nannan Liu,<sup>\*abc</sup> Jinzheng Zhang,<sup>ab</sup> Tingyan Ye,<sup>ab</sup>  
Kangyan Yi,<sup>ab</sup> Xingxing Tang<sup>d</sup> and Qian Shi<sup>\*b</sup>

<sup>a</sup> Key Laboratory of Carbon Materials of Zhejiang Province, College of Chemistry & Materials Engineering, Wenzhou University, Wenzhou 325027, P. R. China.

<sup>b</sup> College of Chemistry and Materials Engineering, Wenzhou University, Wenzhou 325000, P. R. China.

<sup>c</sup> Institute of New Materials & Industry Technology, Wenzhou University, Wenzhou 325000, P. R. China.

<sup>d</sup> College of optoelectronic manufacturing, Zhejiang Industry & Trade Vocational College, Wenzhou, 325003, China

\*To whom correspondence should be addressed: liunannan@wzu.edu.cn, shiq@wzu.edu.cn

## **Table of Content**

- 1. Materials and reagents.**
- 2. Parameters of preparation for glass micropipettes.**
- 3. SEM and Microscopic photograph.**
- 4. Current measurement after absorbing H<sub>2</sub>S.**
- 5. Current measurement of H<sub>2</sub>S@MIL-68(In)-MP respond to Zn<sup>2+</sup>.**
- 6. Energy Dispersive X-Ray spectroscopy (EDS) pattern.**
- 7. XPS patterns.**
- 8. Current measurement of H<sub>2</sub>S@MIL-68(In)-MP respond to Hg<sup>2+</sup>.**
- 9. X-ray diffraction (XRD) pattern.**
- 10. N<sub>2</sub> absorption isotherms of MIL-68(In) and H<sub>2</sub>S@MIL-68(In).**
- 11. Current measuring device.**
- 12. SEM of H<sub>2</sub>S@MIL-68(In) powder combine with Hg<sup>2+</sup>.**
- 13. Comparison with other sensor.**

## 1. Materials and reagents

All reagents are purchased and used directly without further purification. p-Phthalic acid (PTA 99%), N,N-Dimethylformamide (DMF AR 99.5%), Isopropyl Alcohol (99.8%), Ethanol absolute (99.8%), Copper nitrate trihydrate (99%), Potassium chloride (99.5%), Mercury solution (analytical standard), Zinc nitrate hexahydrate (99%), Lead nitrate (99%) was purchased from Shanghai Aladdin Biochemical Technology Co., Ltd. Indium nitrate hydrate ( $\text{InNO}_3 \cdot x\text{H}_2\text{O}$  99.9%) was purchased from Sarne Chemistry Technology (Shanghai) Co., Ltd. Acetonitrile (99.8%) was purchased from Shanghai Macklin Biochemical Co., Ltd. 1,3,5-Benzenetricarboxylic acid (99%), 3-(Triethoxysilyl) propylsuccinic anhydride (TESP-SA 95%) was purchased from J&K Chemical Ltd.

Ag/AgCl electrodes (0.50\*37 mm) are purchased from Shanghai YueCi Electronic Technology Co., Ltd. Borosilicate glass (10 cm length, outer diameter: 1.2 mm, inner diameter: 0.60 mm) are purchased from Sutter Instrument Co., U.S.A.

## 2. Parameters of preparation for glass micropipettes.

| HEAT | PULL | VEL | TIME |
|------|------|-----|------|
| 645  | 5    | 5   | 150  |
| 645  | 5    | 5   | 150  |
| 645  | 5    | 5   | 150  |
| 645  | 40   | 5   | 150  |
| 645  | 60   | 5   | 150  |

**Table 1.** Parameters of preparation for glass micropipettes. The borosilicate glass was fixed on the P-97 micropipette puller, and the glass micropipettes with fixed radius can be prepared by adjusting the parameters.

### 3. SEM and Microscopic photograph.

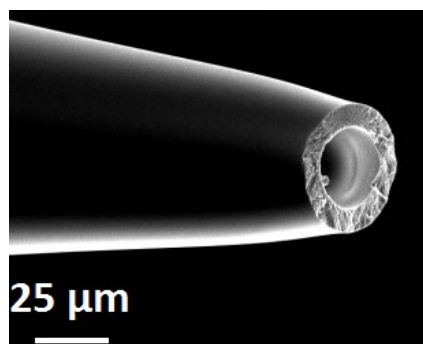

**Fig. S1** SEM image of blank glass micropipette with diameter is  $20 \pm 1 \mu\text{m}$ .

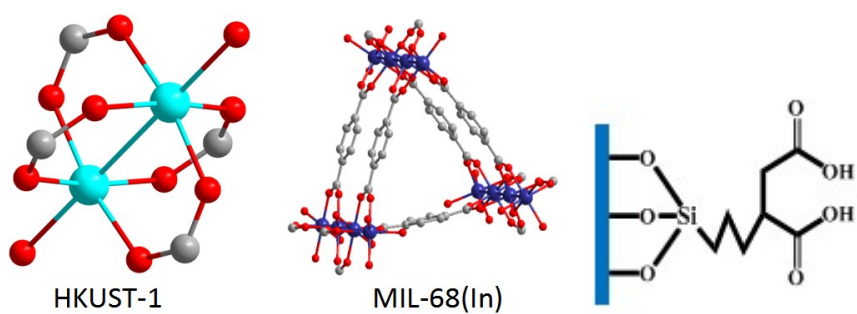

**Fig. S2** After the inner surface modification of the glass micropipette, the carboxyl groups exist on the inner surface of the glass micropipette, which promotes the *in-suit* growth of MOFs in the micropipette.

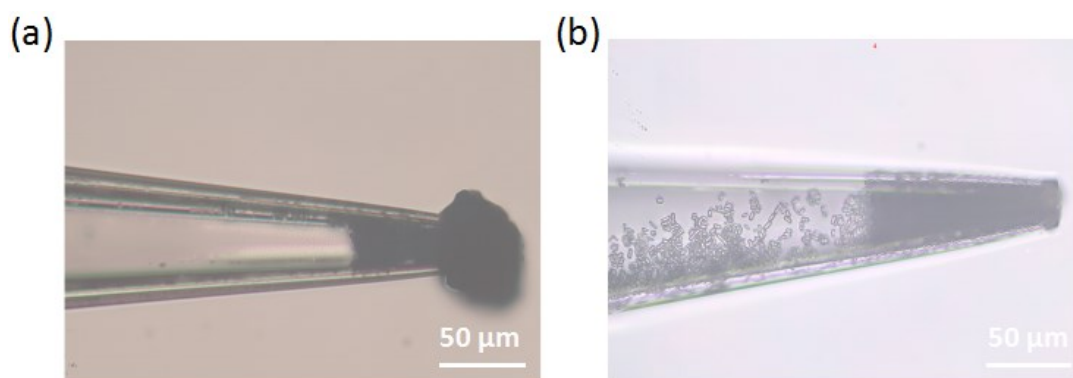

**Fig. S3** Microscopic photographs of HKUST-1-MP (a) and MIL-68(In)-MP (b).

#### 4. Current measurement after absorbing H<sub>2</sub>S.

HKUST-1-MP and MIL-68(In)-MP were used to absorb H<sub>2</sub>S for 10 hours, and the I-V curves were tested respectively.

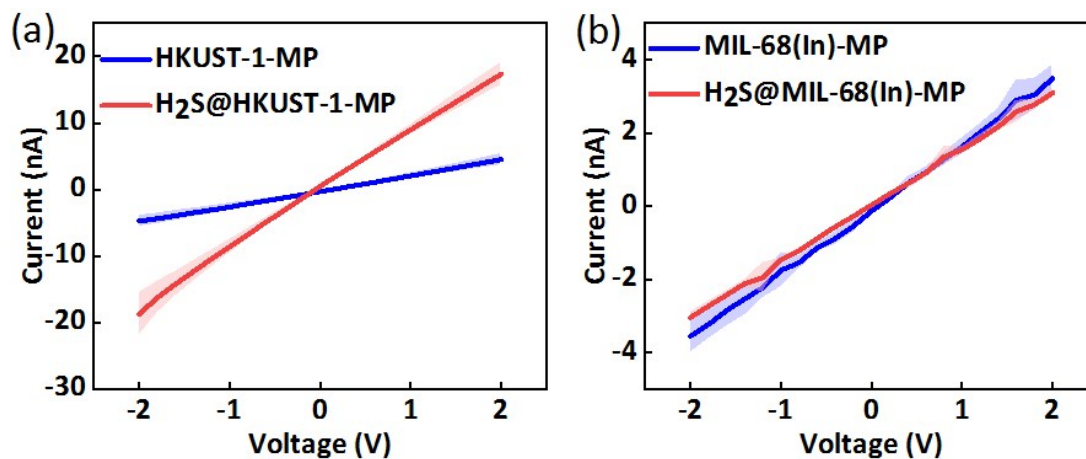

Fig. S4 (a) I-V curves in 0.1 M KCl of HKUST-1-MP and H<sub>2</sub>S@HKUST-1-MP. (b) I-V curves in 0.1 M KCl of MIL-68(In)-MP and H<sub>2</sub>S@MIL-68(In)-MP. The shaded area is the margin of error.

#### 5. Current measurement of H<sub>2</sub>S@MIL-68(In)-MP respond to Zn<sup>2+</sup>.

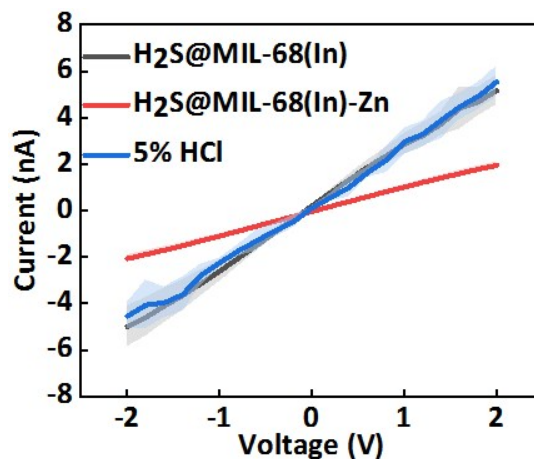

Fig. S5 I-V curves in 0.1M KCl of H<sub>2</sub>S@MIL-68(In)-MP and after treated with 0.5  $\mu$ M Zn<sup>2+</sup> solution. The current returns to initial current after 5 % HCl treatment. The shaded area is the margin of error.

## 6. Energy Dispersive X-Ray spectroscopy (EDS) pattern.

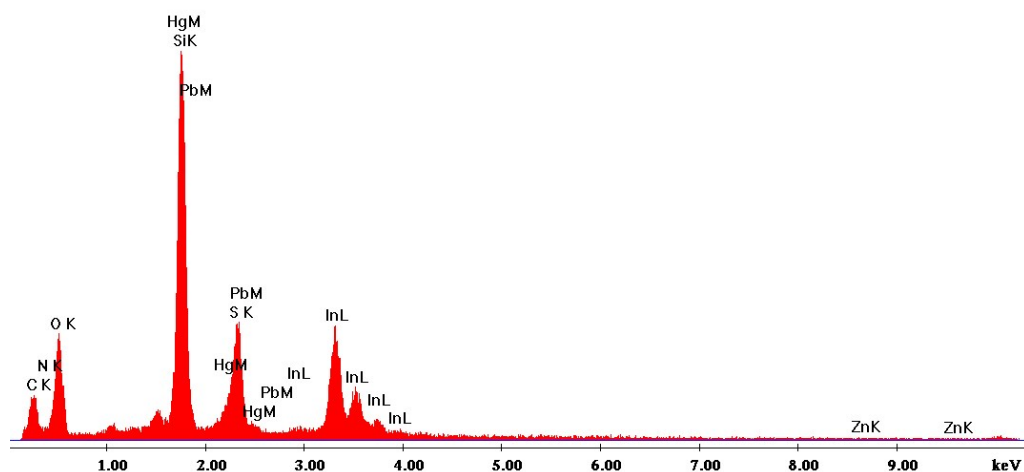

**Fig. S6** Energy Dispersive X-Ray Spectroscopy of  $\text{H}_2\text{S@MIL-68(In)-MP}$  after treating with a mixture of mercury, lead and zinc ions solution.

| Elem  | Wt%    | At%    |
|-------|--------|--------|
| C     | 2.30   | 4.68   |
| N     | 8.52   | 14.88  |
| O     | 34.04  | 52.04  |
| Si    | 22.03  | 19.18  |
| S     | 5.47   | 4.17   |
| In    | 17.44  | 3.71   |
| Hg    | 5.07   | 0.62   |
| Pb    | 4.74   | 0.56   |
| Zn    | 0.41   | 0.15   |
| Total | 100.00 | 100.00 |

**Table 2.** The contents and percentages of various elements of EDS shown.

## 7. XPS patterns.

The S 2p spectra analyses of the H<sub>2</sub>S@MIL-68(In) and after treatment with mixed ions solution were shown. The peaks located at 162.98 and 161.88 eV after treatment. The peak of 162.98 eV was attributed to S<sub>2</sub><sup>2-</sup>. The peak of 161.88 eV was attributed to the S<sup>2-</sup> because of H<sub>2</sub>S and the formation of HgS, PbS and ZnS.<sup>1</sup> After soaking in the mixed ions solution, the peak of S<sub>2</sub><sup>2-</sup> shifted to the direction of decreasing the binding energy. This indicates that more sulfur and metal ions precipitate, resulting in sulfur gaining electrons and increasing electron density. Compared to H<sub>2</sub>S@MIL-68(In), the binding energy of the peak decreases.

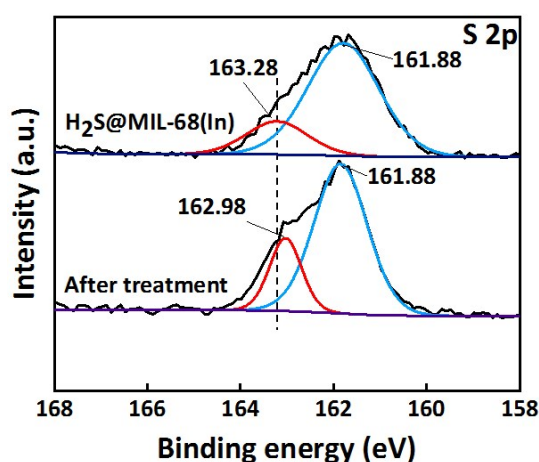

**Fig. S7** The S 2p XPS spectra of the H<sub>2</sub>S@MIL-68(In) and after treating with 5×10<sup>4</sup> nM mixed ions solution.

## 8. Current measurement of H<sub>2</sub>S@MIL-68(In)-MP respond to Hg<sup>2+</sup>.

The prepared MIL-68(In)-MP was measured with 0.1M KCl, and then used to absorb H<sub>2</sub>S for 10 hours. After the absorption of H<sub>2</sub>S (H<sub>2</sub>S@MIL-68(In)-MP), the tip of H<sub>2</sub>S@MIL-68(In)-MP was placed in 0.5 μM mercury solution for 30 minutes. After taking it out, the current of H<sub>2</sub>S@MIL-68(In)-MP combining with mercury ions was detected. Fig. S8a shows that the H<sub>2</sub>S@MIL-68(In)-MP sensitively responds to mercury ions and the rate of current decrease was 87%, while the MIL-68(In)-MP was only 15% (Fig. S8b). Below this threshold, the signal may stem from some non-specific interactions.

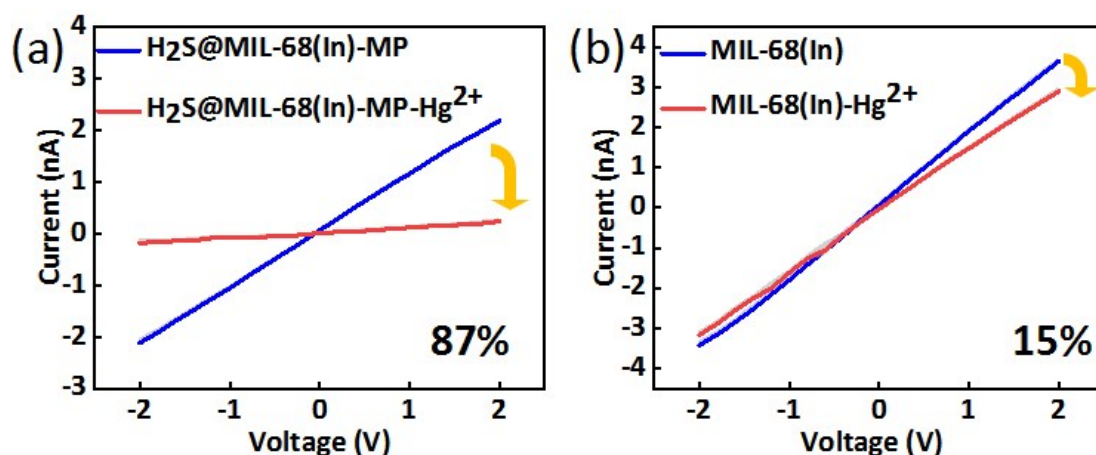

**Fig. S8** I-V curves of MIL-68(In)-MP and H<sub>2</sub>S@MIL-68(In)-MP after treated with 0.5 μM Hg<sup>2+</sup> solution.

1 mM Na<sub>2</sub>S acts as a recoverable agent for the nanochannel. Stability and reversible switching properties were further tested based on this property. However, due to the alkaline nature of the Na<sub>2</sub>S solution, the stability of the MIL-68(In) was challenged during this process. In the first time, the H<sub>2</sub>S@MIL-68(In)-MP was used to detect 0.5 nM Hg<sup>2+</sup> which the rate of current decrease was 25.88%. The current increased 16.81% compared with the initial current when the nanochannel was opened by Na<sub>2</sub>S. This indicates that alkaline Na<sub>2</sub>S has a slight destructive effect on the MIL-68(In) which were modified at the tip of micropipette. In the second time, H<sub>2</sub>S@MIL-68(In)-MP was used to detect 0.5 nM Hg<sup>2+</sup>, the rate of current decrease was 26.64%, which prove that H<sub>2</sub>S@MIL-68(In)-MP still has the ability to detect mercury. However, compared with the initial current, the rate of current decrease was only 14.30%, which was lower than rate of non-specific interactions (15%).

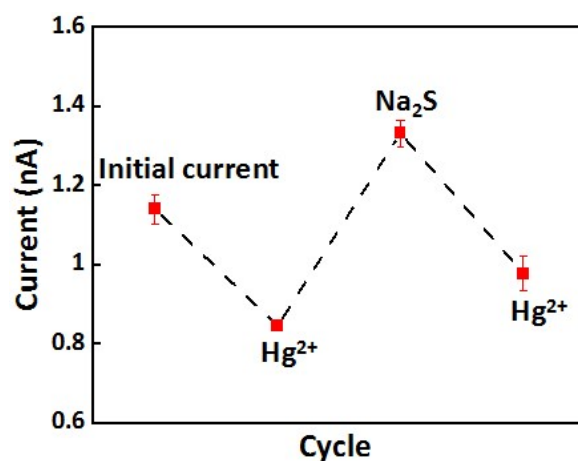

**Fig. S9** The cycle performance of Hg<sup>2+</sup> at the detection limit of 0.5 nM.



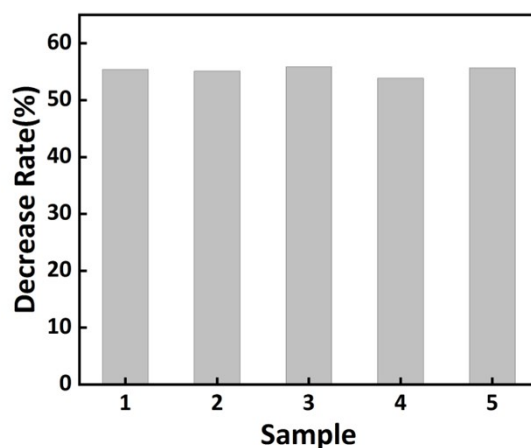

**Fig. S10** Current decrease rate of  $\text{H}_2\text{S}@\text{MIL-68}(\text{In})\text{-MP}$  bound with  $0.5 \mu\text{M Hg}^{2+}$  after absorbing  $\text{H}_2\text{S}$  for 10 hours and leave for 36 hours. All signals decrease by about 55 %, which is down from 87 % in the previous test.

### 9. X-ray diffraction (XRD) pattern.

Both HKUST-1 and MIL-68(In) powders were dried before X-ray diffraction (XRD) analysis. The instrument used for XRD analysis is Germany Bruker D8 X-ray diffractometer. Cu  $K\alpha$  radiation source was used ( $\lambda = 1.5 \text{ \AA}$ ). The analysis was operated at 40 mA and 40 kV, and the  $2\theta$  was varied from  $5.0$  to  $50^\circ$  with a step of  $1.0^\circ/\text{min}$ . By comparing the following crystal standard spectra, it was confirmed that HKUST-1 and MIL-68(In) were synthesized in the experiment.

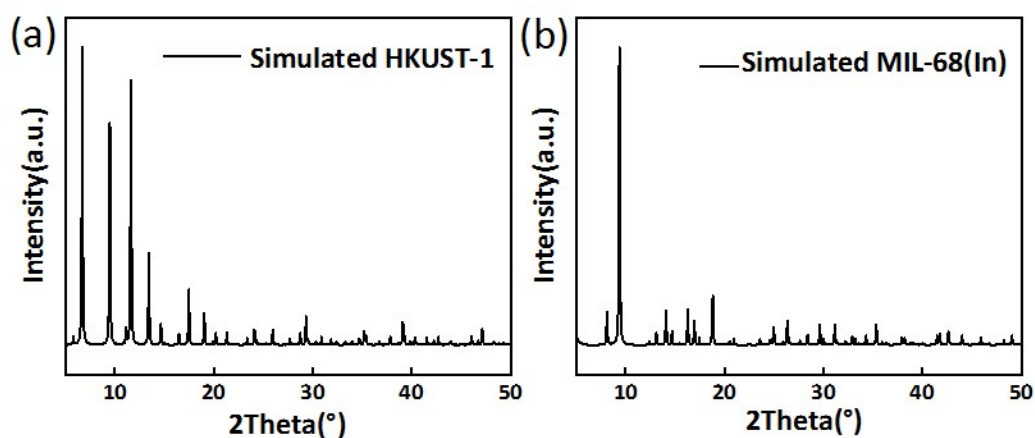

**Fig. S11** XRD pattern of simulated HKUST-1 and MIL-68(In).

### 10. N<sub>2</sub> absorption isotherms of MIL-68(In) and H<sub>2</sub>S@MIL-68(In).

Compared the N<sub>2</sub> absorption isotherms of MIL-68(In) and H<sub>2</sub>S@MIL-68(In), the N<sub>2</sub> absorption volume of H<sub>2</sub>S@MIL-68(In) was 92.73cm<sup>3</sup>/g higher than that of MIL-68(In). This may be due to the chemical reaction between MIL-68(In) and H<sub>2</sub>S. In particular, before the N<sub>2</sub> absorption isotherms test, the H<sub>2</sub>S@MIL-68(In) were activated for 10 hours at 100 °C, which may have exacerbated the reaction and caused the change of N<sub>2</sub> absorption behavior. Pore size distribution of MIL-68(In) and H<sub>2</sub>S@MIL-68(In) show that most pore are still at the sizes of 2-6 nm.

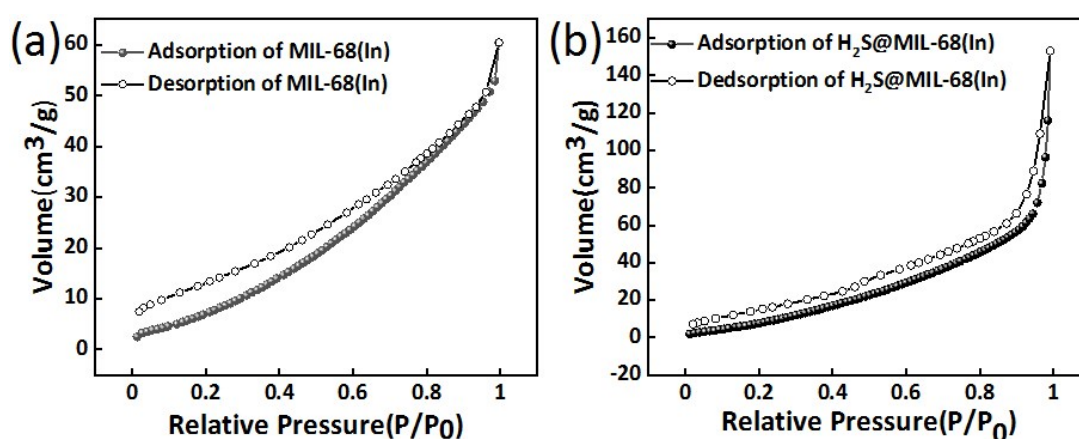

Fig. S12 N<sub>2</sub> adsorption isotherms of MIL-68(In) and H<sub>2</sub>S@MIL-68(In).

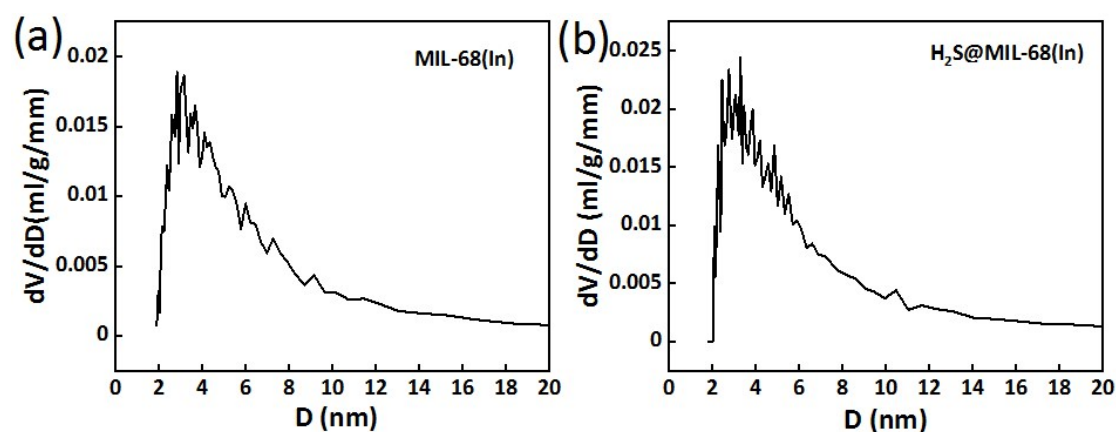

Fig. S13 Pore size distributions of MIL-68(In) and H<sub>2</sub>S@MIL-68(In).

### 11. Current measuring device.

All I-V tests were performed using the following apparatus, which using two Ag/AgCl electrodes. One electrode was directly immersed in the 0.1 M KCl electrolyte, another electrode was inserted into the micropipette from the base. Keithley 6487 picoammeter (Keithley Instruments, Cleveland, OH, USA) was connected to form a closed circuit. Before the test, the electrodes were soaked overnight in sodium hypochlorite solution.

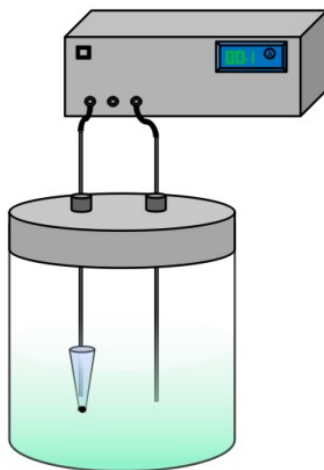

**Fig. S14** Device diagram for testing the current through the micropipettes.

### 12. SEM of H<sub>2</sub>S@MIL-68(In) powder combine with Hg<sup>2+</sup>.

The prepared H<sub>2</sub>S@MIL-68(In) powder was added to 0.5 μM mercury solution for soaking 30 minutes, then centrifuged and dried at 80 °C. The powder was characterized by SEM. Fig. S15 confirmed that many flocculent precipitates appear in MIL-68(In) crystals after binding with mercury.

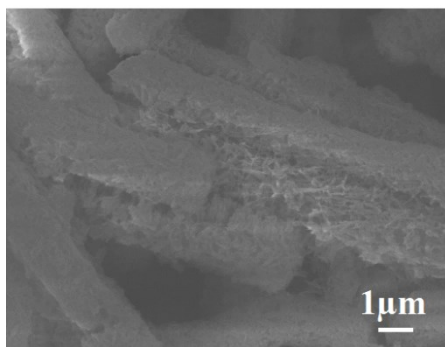

**Fig. S15** SEM image of H<sub>2</sub>S@MIL-68(In) powder combine with 0.5 μM Hg<sup>2+</sup>.

### 13. Comparison with other sensor.

| Reference | Materials                                                         | Detection Technique                 | Detection Limit |
|-----------|-------------------------------------------------------------------|-------------------------------------|-----------------|
| 2         | PET and AIE property organics                                     | fluorescence and ion current signal | 1 $\mu$ M       |
| 3         | AAO and DNA                                                       | ion current signal                  | 1 nM            |
| 4         | DNA and Fe <sub>3</sub> O <sub>4</sub> @Au magnetic nanoparticles | Square wave voltammograms           | 1.7 nM          |
| This work | Glass micropipets and MOFs                                        | ion current signal                  | 0.5 nM          |

**Table 3.** Comparison of different sensors used for mercury detection.

### References

1. Z. Yang, H. Li, C. Liao, J. Zhao, S. Feng, P. Li, X. Liu, J. Yang and K. Shih, *ACS Appl. Nano Mater.*, 2018, **1**, 4726-4736.
2. X. Xu, R. Hou, P. Gao, M. Miao, X. Lou, B. Liu and F. Xia, *Anal. Chem.*, 2016, **88**, 2386-2391.
3. H. Wang, S. Hou, Q. Wang, Z. Wang, F. Xia and J. Zhan, *J. Mater. Chem. B*, 2015, **3**, 1699.
4. P. Miao, Y. Tang and L. Wang, *ACS Appl. Mater. Interfaces*, 2017, **9**, 3940-3947.
